# Supplementary material for: Molecular conformational transition of chiral conjugated enantiomers dominated by Wallach's rule
Source: Royal Society of Chemistry journal article supplement (doi:10.1039/d1tc00978h), 2021-01-01
Supplement: d1tc00978h1.pdf [file d1tc00978h1.pdf]

## Supporting Information

### **Molecular Conformational Transition of Chiral Conjugated Enantiomer Dominated by the Wallach's Rule**

Meng-Na Yu,<sup>a</sup> Yin-Xiang Li,<sup>b</sup> Man Xu,<sup>a</sup> Jin-Yi Lin,<sup>b\*</sup> Jia-Bin Gu,<sup>a</sup> Ning-Sun,<sup>b</sup> Dong-Qing Lin,<sup>a</sup> Yong-Xia Wang,<sup>a</sup> Ling-Hai Xie,<sup>a\*</sup> Wei Huang<sup>abc\*</sup>

<sup>a</sup>Center for Molecular Systems and Organic Devices (CMSOD), Key Laboratory for Organic Electronics and Information Displays & Institute of Advanced Materials (IAM), Nanjing University of Posts & Telecommunications, 9 Wenyuan Road, Nanjing 210023, China. E-mail: iamlhxie@njupt.edu.cn, wei-huang@njtech.edu.cn.

<sup>b</sup>Key Laboratory of Flexible Electronics (KLOFE) & Institute of Advanced Materials (IAM), Nanjing Tech University (NanjingTech), 30 South Puzhu Road, Nanjing 211816, China. E-mail: iamjylin@njtech.edu.cn

<sup>c</sup>Frontiers Science Center for Flexible Electronics (FSCFE), Shaanxi Institute of Flexible Electronics (SIFE) & Shaanxi Institute of Biomedical Materials and Engineering (SIBME), Northwestern Polytechnical University (NPU), 127 West Youyi Road, Xi'an 710072, China.

**Keywords:** chirality, molecular conformation, conjugated enantiomer, Wallach's rule, photophysical property

#### Supplementary Materials

- Fig. S1  $^1\text{H}$  NMR spectra of *rac*-, (*R,R*)- and (*S,S*)-2O8-DPFOH-SFX in  $\text{CDCl}_3$ .
- Fig. S2  $^{13}\text{C}$  NMR spectra of *rac*-2O8-DPFOH-SFX in  $\text{CDCl}_3$ .
- Fig. S3  $^{13}\text{C}$  NMR spectra of (*R,R*)-2O8-DPFOH-SFX in  $\text{CDCl}_3$ .
- Fig. S4  $^{13}\text{C}$  NMR spectra of (*S,S*)-2O8-DPFOH-SFX in  $\text{CDCl}_3$ .
- Fig. S5 Chiral chromatography report of *rac*-2O8-DPFOH-SFX.
- Fig. S6 HPLC of (*R,R*)-2O8-DPFOH-SFX.
- Fig. S7 HPLC of (*S,S*)-2O8-DPFOH-SFX.
- Fig. S8 Simulated circular dichroism spectra of (*R,R*)- and (*S,S*)-2O8-DPFOH-SFX by TD-DFT at the B3LYP/6-31G(d) level.
- Fig. S9 UV-vis absorption and PL spectra of 2O8-DPFOH-SFX films drop-cast from toluene solution in each form.
- Fig. S10 TG curves of 2O8-DPFOH-SFX in each form.

## ● EXPERIMENTAL SECTION

### Chemicals

All the solvents and reagents were purchased from commercial suppliers and used without further purification unless otherwise noted. When required products were purified by flash column chromatography using Kanto Silica Gel (Kanto Chemical Co., Inc., Xuhui District, Shanghai, China) 60N (40-63  $\mu\text{m}$ ). Spectrochemical-grade solvents were used for optical measurements. The model spiroterfluorene, 2O8-DPFOH-SFX was obtained according to previously published protocols. The two pure enantiomers, (*R,R*)- and (*S,S*)-2O8-DPFOH-SFX, were obtained by chiral high-performance liquid chromatography (HPLC) with hexane/dichloromethane (1:1) as eluent.

### Characterization

The  $^1\text{H}$ - and  $^{13}\text{C}$ -NMR spectra were recorded in  $\text{CDCl}_3$  with tetramethylsilane (TMS) as the interval standard, using a Bruker 400 MHz spectrometer. Circular dichroism spectra were measured using BRIGHTTIME Chirascan, JASCO810, Jasco-815. The chiral HPLC measurements were conducted using Chiralpak IB N-5 column. The absorption spectra of the solutions and pristine films before and after annealing were measured using a Shimadzu UV-3600 spectrometer (Shimadzu Corporation, Nanjing, Jiangsu, China) at room temperature, and the emission spectra were recorded using a Shimadzu RF-530XPC luminescence spectrometer (Shimadzu Corporation, Nanjing, Jiangsu, China) after excitation at 360 nm. The quartz cells of 10 mm thickness were used to measure the spectra of the dilute solutions, and the solutions were added into a tube and dipped into a quartz container filled with liquid nitrogen. Thermogravimetric analysis (TGA) was conducted by a Shimadzu thermogravimetry and differential thermal analysis DTG-60H at a heating rate of 10  $^\circ\text{C}/\text{min}$  and a nitrogen flow rate of 50  $\text{cm}^3/\text{min}$ . Differential scanning calorimetry (DSC) measurements were performed under a  $\text{N}_2$  atmosphere at both the heating and cooling rates of 10  $^\circ\text{C}/\text{min}$  using Shimadzu DSC-60A. The AFM images were obtained using a Dimension

3100 (Veeco, CA) in tapping model with a Si tip (resonance frequency: 320 kHz; spring constant: 42 N m<sup>-1</sup>) at a scanning rate of 1 Hz. XRD spectra were recorded on a Rigaku X-ray diffractometer with Cu K $\alpha$  radiation ( $\lambda = 1.54178 \text{ \AA}$ ), and the operating  $2\theta$  angle ranged from 3° to 30°, with the step length of 0.025. The PLQY was measured using an Edinburgh FLSP920 fluorescence spectrophotometer equipped with a xenonarc lamp (Xe900). Nanosecond time-resolved studies were performed with an Edinburgh FLS 980 time-correlated single photon-counting (TCSPC). The thin films were prepared by spin-coating on a quartz plate at a rate of 1500 rpm from 10 mg/mL in toluene solution.

#### Supplementary Materials

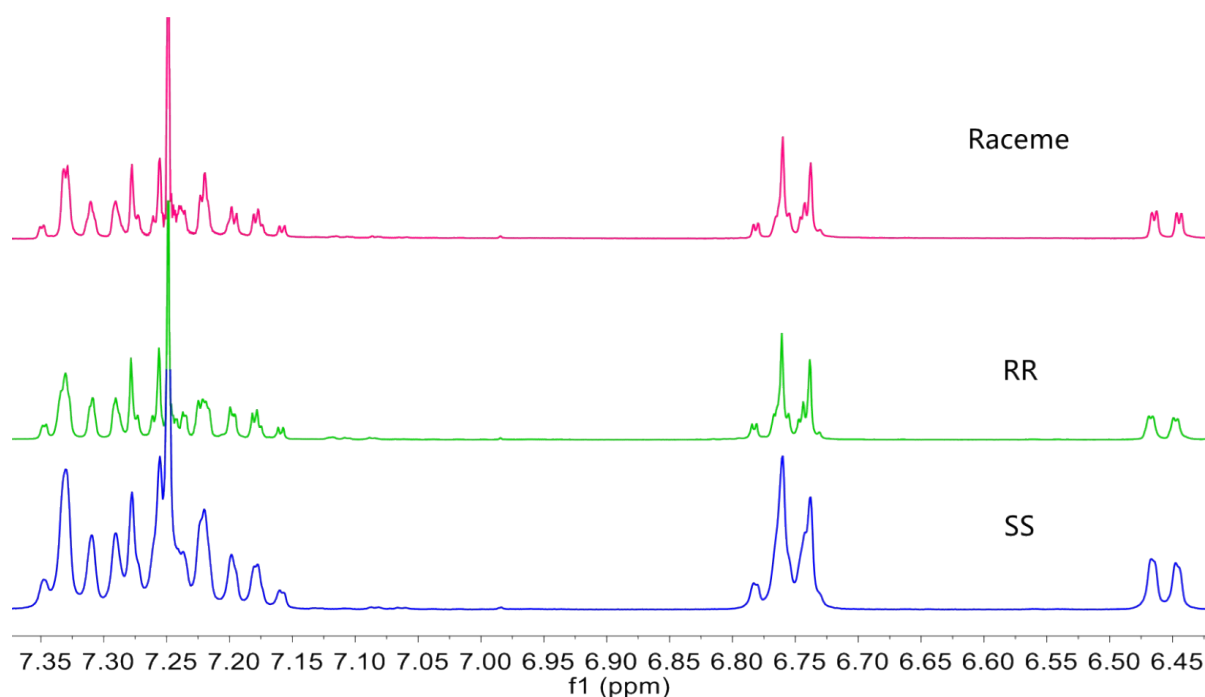

**Fig. S1** <sup>1</sup>H NMR spectra of *rac*-, (*R,R*)- and (*S,S*)-2O8-DPFOH-SFX in CDCl<sub>3</sub>.

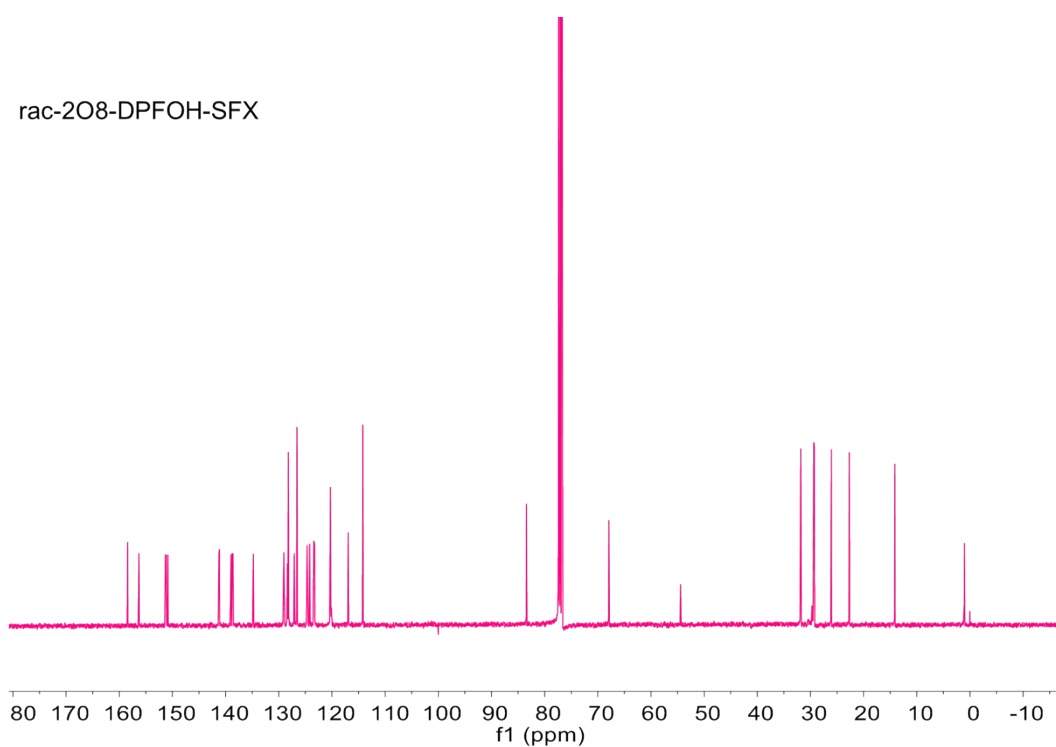

**Fig. S2**  $^{13}\text{C}$  NMR spectra of *rac*-2O8-DPFOH-SFX in  $\text{CDCl}_3$ .

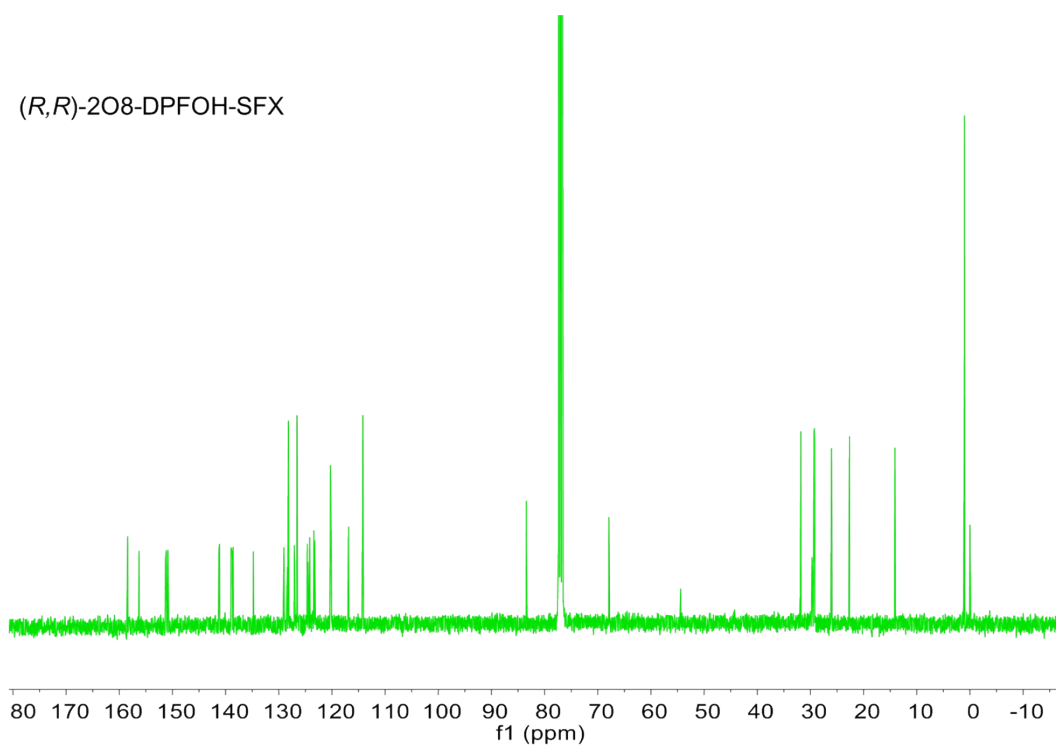

**Fig. S3**  $^{13}\text{C}$  NMR spectra of (*R,R*)-2O8-DPFOH-SFX in  $\text{CDCl}_3$ .

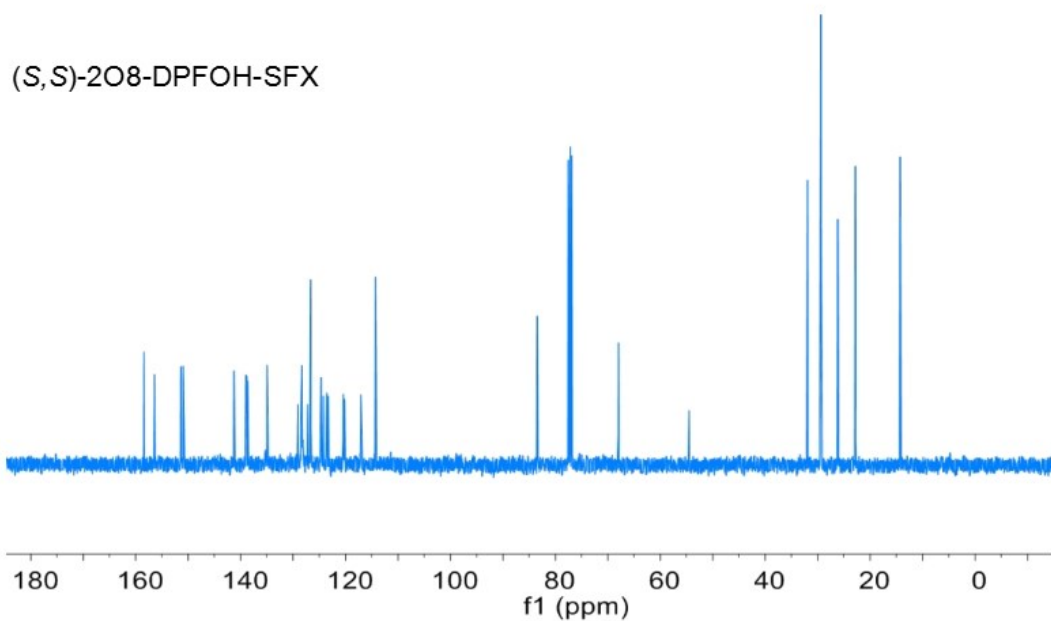

**Fig. S4**  $^{13}\text{C}$  NMR spectra of (*S,S*)-2O8-DPFOH-SFX in  $\text{CDCl}_3$ .

Table S1 Chiral chromatography report.

|                |                                 |
|----------------|---------------------------------|
| Column         | CHIRALPAK IB N-5 (IBN5CD-VD005) |
| Column size    | 0.46 cm I.D. $\times$ 15 cm L   |
| Injection      | 2 $\mu\text{L}$                 |
| Mobile phase   | Hexane/DCM = 50/50 (V/V)        |
| Flow rate      | 0.5 mL/min                      |
| Wavelength     | UV 254 nm                       |
| Temperature    | 25 $^{\circ}\text{C}$           |
| HPLC equipment | Shimadzu LC-20AD CP-HPLC-05     |

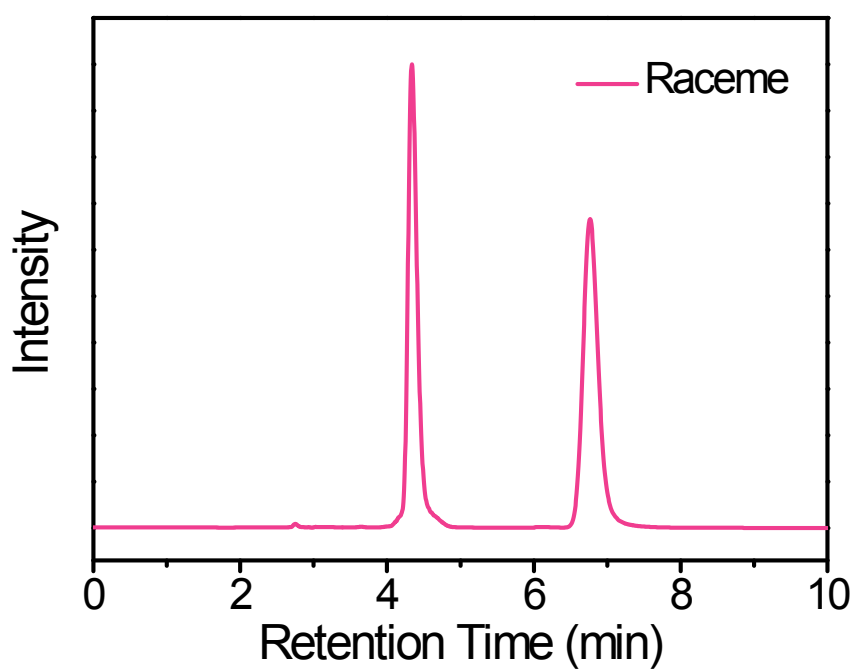

<Peak Table>

| Peak No. | Ret. Time | Area    | Area%   | T.Plale  | Tailing | Resolution |
|----------|-----------|---------|---------|----------|---------|------------|
| 1        | 4.350     | 1681845 | 50.7989 | 4124.230 | 1.075   | 2.830      |
| 2        | 6.760     | 1628942 | 49.2011 | 4114.095 | 1.092   | --         |

**Fig. S5** Chiral chromatography report of *rac*-2O8-DPFOH-SFX.

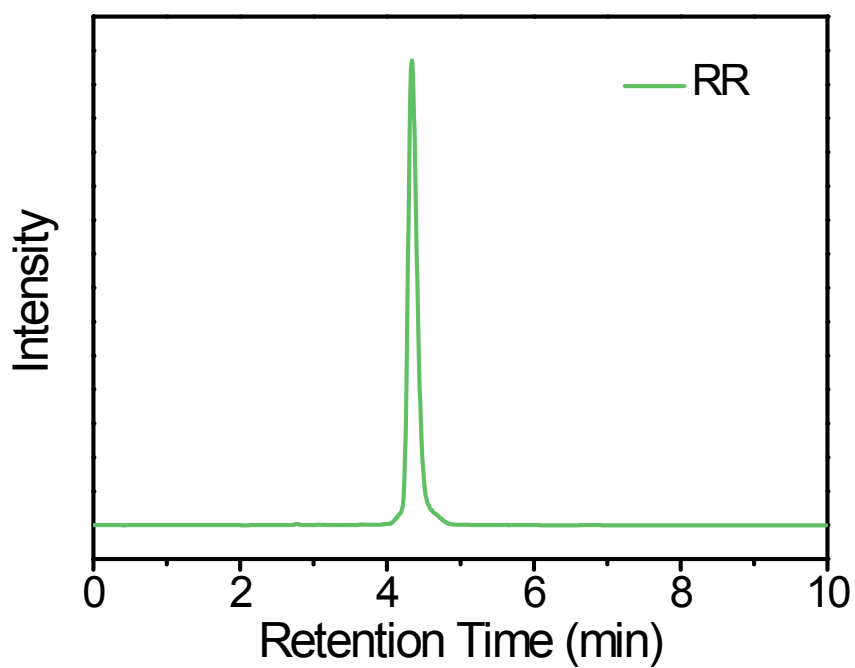

<Peak Table>

| Peak No. | Ret. Time | Area    | Area%  | T.Plale  | Tailing | Resolution |
|----------|-----------|---------|--------|----------|---------|------------|
| 1        | 4.339     | 12507.1 | 99.921 | 3647.113 | --      | --         |
| 2        | 5.902     | 9.9     | 0.079  | 2768.764 | --      | 0.719      |

**Fig. S6** HPLC of (*R,R*)-2O8-DPFOH-SFX.

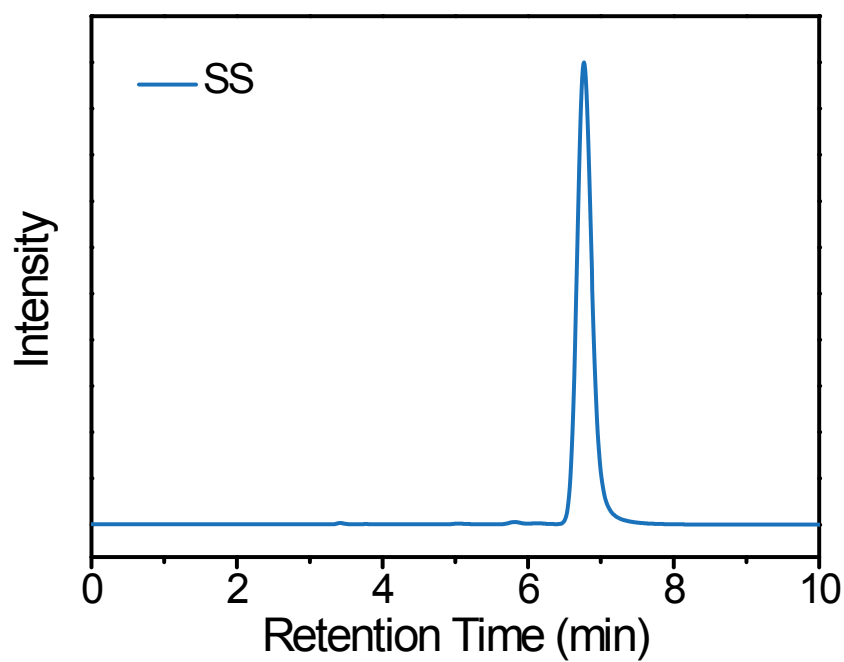

<Peak Table>

| Peak No. | Ret. Time | Area    | Area%  | T.Plale  | Tailing | Resolution |
|----------|-----------|---------|--------|----------|---------|------------|
| 1        | 5.001     | 5485    | 0.175  | 3484.001 | --      | --         |
| 2        | 6.760     | 3128222 | 99.825 | 4423.147 | 1.269   | 4.720      |

**Fig. S7** HPLC of (*S,S*)-2O8-DPFOH-SFX.

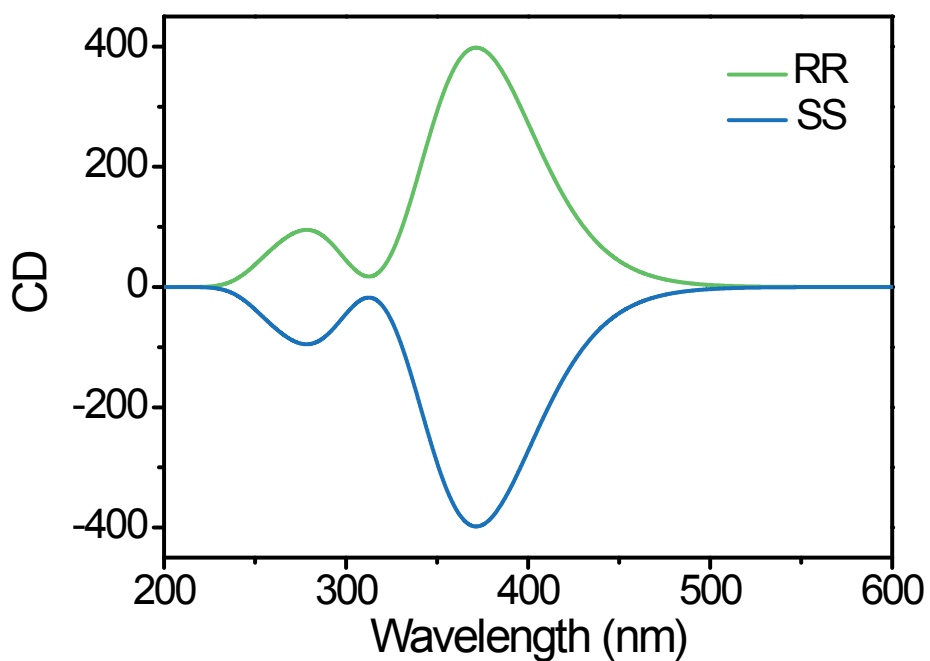

**Fig. S8** Simulated circular dichroism spectra of *(R,R)*- and *(S,S)*-2O8-DPFOH-SFX by TD-DFT at the B3LYP/6-31G(d) level.

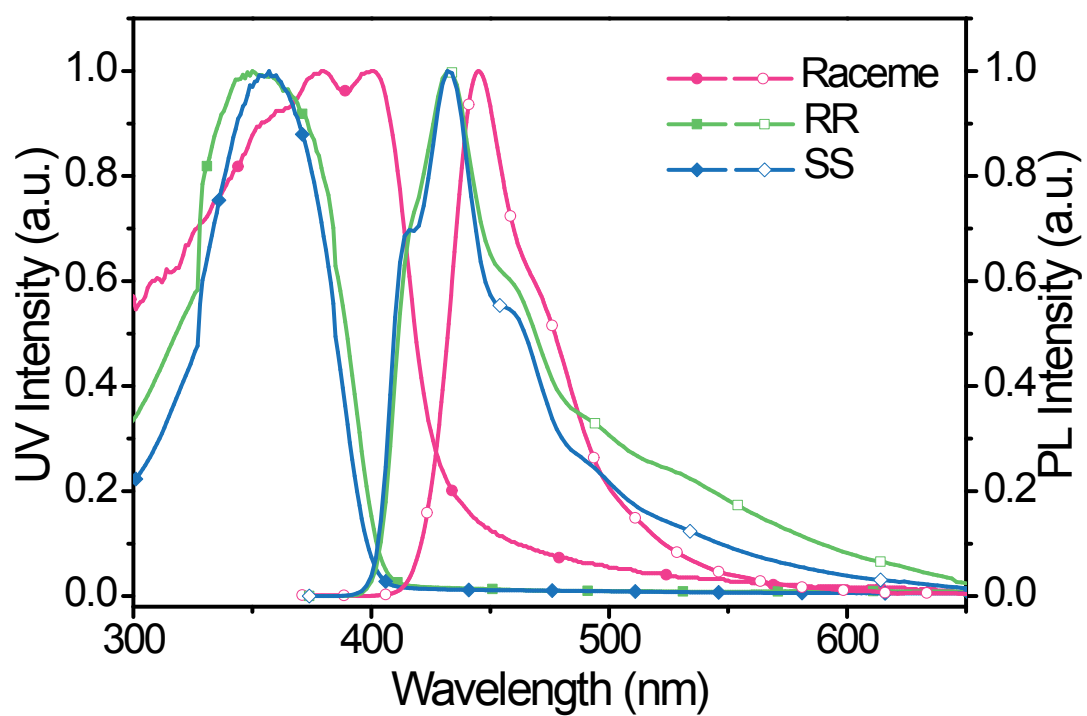

**Fig. S9** UV-vis absorption and PL spectra of 2O8-DPFOH-SFX films drop-cast from toluene solution in each form.

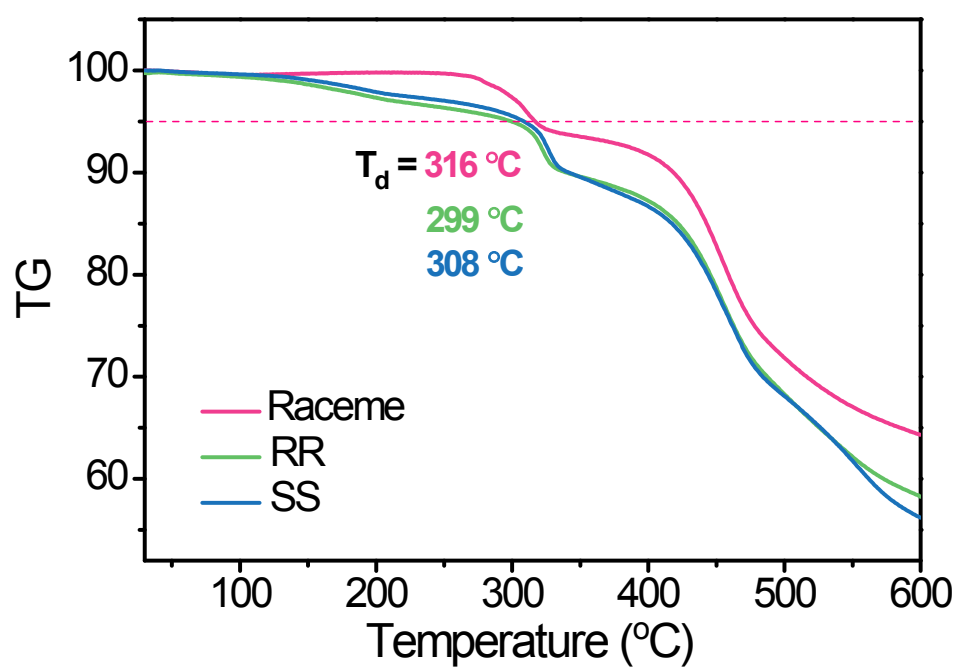

**Fig. S10** TG curves of 2O8-DPFOH-SFX in each form.
